# Supplementary material for: Investigation of Biomaterial Ink Viscosity Properties and Optimization of the Printing Process Based on Pattern Path Planning
Source: MDPI journal article supplement (doi:10.3390/bioengineering10121358), 2023-11-26
Supplement: s1 [file s1]

## Supplementary Information

The model of computational fluid dynamics was built on the basis of the actual dimensions of the 25G needle tip, which retained the important features of the tip, as shown in Fig. S1.

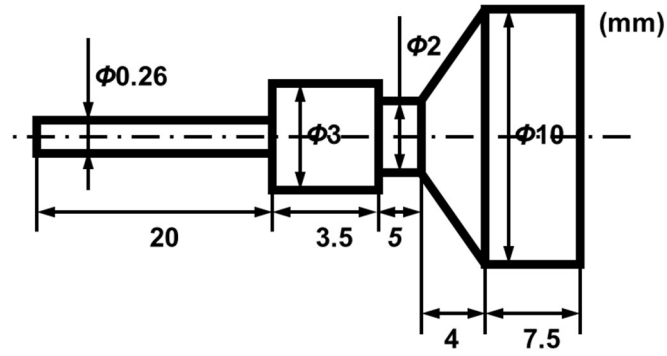

**Fig. S1** Simulation model of the nozzle.

The relationship between the viscosity property of biomaterial inks and the concentration of compositions was explored by response surface methodology (RSM), with 17 sets of experimental points designed and randomized by Box-Behnken method. Rheological experiments were carried out to obtain the power-law index (n) and the consistency coefficient (K) of the biomaterial inks formulated at each experimental point, as shown in Table S1. Afterwards, the results were transferred to RSM for data analysis and the model was validated by ANOVA, as shown in Tables S2 and S3.

**Table S1** RSM experimental design and results for the rheological properties of biomaterial inks

| Order | Gel (wt%) | SA (wt%) | MC (wt%) | n    | K (Pa·s) |
|-------|-----------|----------|----------|------|----------|
| 1     | 6         | 5        | 3        | 0.61 | 42.06    |
| 2     | 8         | 4        | 3        | 0.59 | 48.80    |
| 3     | 8         | 3        | 2        | 0.66 | 19.17    |
| 4     | 8         | 4        | 3        | 0.61 | 41.95    |
| 5     | 10        | 4        | 2        | 0.50 | 85.08    |
| 6     | 6         | 3        | 3        | 0.67 | 15.91    |
| 7     | 8         | 3        | 4        | 0.55 | 60.41    |
| 8     | 10        | 3        | 3        | 0.49 | 78.82    |
| 9     | 8         | 5        | 2        | 0.57 | 59.98    |
| 10    | 10        | 5        | 3        | 0.36 | 281.20   |
| 11    | 8         | 4        | 3        | 0.65 | 37.38    |
| 12    | 8         | 4        | 3        | 0.58 | 44.54    |
| 13    | 6         | 4        | 2        | 0.67 | 18.84    |
| 14    | 8         | 5        | 4        | 0.44 | 192.12   |
| 15    | 6         | 4        | 4        | 0.63 | 38.30    |
| 16    | 8         | 4        | 3        | 0.58 | 52.30    |
| 17    | 10        | 4        | 4        | 0.36 | 276.61   |

**Table S2** ANOVA for the power-law index

| Source      | df | Adj SS | Adj MS | F-value | P-value |
|-------------|----|--------|--------|---------|---------|
| Model       | 7  | 0.1500 | 0.0214 | 37.98   | <0.0001 |
| Gel         | 1  | 0.0923 | 0.0923 | 163.61  | <0.0001 |
| SA          | 1  | 0.0180 | 0.0180 | 31.87   | 0.0003  |
| MC          | 1  | 0.0225 | 0.0225 | 39.85   | 0.0001  |
| Gel*Gel     | 1  | 0.0083 | 0.0083 | 14.62   | 0.0041  |
| SA*SA       | 1  | 0.0028 | 0.0028 | 5       | 0.0523  |
| MC*MC       | 1  | 0.0019 | 0.0019 | 3.39    | 0.0985  |
| Gel*MC      | 1  | 0.0029 | 0.0029 | 5.15    | 0.0494  |
| Lack of Fit | 5  | 0.0015 | 0.0003 | 0.35    | 0.8624  |
| Pure Error  | 4  | 0.0035 | 0.0009 |         |         |
| Cor Total   | 16 | 0.1551 |        |         |         |

R-Squared: 96.73%, adjusted R-Squared: 94.18%, predicted R-Squared: 91.02%.

**Table S3** ANOVA for the consistency coefficient

| Source      | df | Adj SS | Adj MS  | F-value | P-value |
|-------------|----|--------|---------|---------|---------|
| Model       | 9  | 112735 | 12526.1 | 124.37  | <0.0001 |
| Gel         | 1  | 45993  | 45992.8 | 456.65  | <0.0001 |
| SA          | 1  | 20105  | 20105   | 199.62  | <0.0001 |
| MC          | 1  | 18468  | 18468.3 | 183.37  | <0.0001 |
| Gel*Gel     | 1  | 6956   | 6956.1  | 69.06   | 0.0001  |
| SA*SA       | 1  | 1497   | 1497.2  | 14.87   | 0.0062  |
| MC*MC       | 1  | 1530   | 1530.4  | 15.19   | 0.0059  |
| Gel*SA      | 1  | 7764   | 7764.2  | 77.09   | 0.0001  |
| Gel*MC      | 1  | 7402   | 7402    | 73.49   | 0.0001  |
| SA*MC       | 1  | 2066   | 2065.5  | 20.51   | 0.0027  |
| Lack of Fit | 3  | 570    | 189.9   | 5.62    | 0.0644  |
| Pure Error  | 4  | 135    | 33.8    |         |         |
| Cor Total   | 16 | 113440 |         |         |         |

R-Squared: 99.38%, adjusted R-Squared: 98.58%, predicted R-Squared: 91.78%.

The neural network model was validated by randomly generating 50 sets of experimental points and calculating the flow rate at the nozzle based on CFD and neural network, respectively, as shown in Table S4.

**Table S4** Simulation validation of the neural network model

| n     | K (Pa·s) | P (kPa) | Q <sub>CFD</sub> (μL) | Q <sub>BP</sub> (μL) |
|-------|----------|---------|-----------------------|----------------------|
| 0.554 | 67.989   | 338.927 | 0.222                 | 0.228                |
| 0.462 | 44.075   | 214.042 | 0.553                 | 0.565                |
| 0.676 | 83.042   | 206.341 | 0.034                 | 0.042                |
| 0.686 | 57.954   | 119.478 | 0.025                 | 0.020                |
| 0.573 | 41.565   | 196.669 | 0.174                 | 0.173                |
| 0.572 | 94.510   | 237.218 | 0.058                 | 0.055                |
| 0.534 | 88.835   | 253.741 | 0.093                 | 0.102                |
| 0.675 | 59.514   | 168.655 | 0.042                 | 0.039                |
| 0.542 | 66.023   | 160.231 | 0.065                 | 0.064                |
| 0.478 | 62.834   | 346.395 | 0.595                 | 0.574                |
| 0.645 | 28.697   | 61.322  | 0.031                 | 0.044                |
| 0.547 | 37.112   | 315.550 | 0.628                 | 0.629                |
| 0.510 | 52.383   | 323.986 | 0.512                 | 0.509                |
| 0.551 | 30.744   | 288.855 | 3.649                 | 3.668                |
| 0.474 | 85.988   | 79.614  | 0.014                 | 0.017                |
| 0.483 | 27.529   | 128.561 | 0.397                 | 0.417                |
| 0.686 | 30.333   | 150.607 | 0.090                 | 0.095                |
| 0.689 | 25.364   | 253.918 | 0.245                 | 0.242                |
| 0.594 | 30.490   | 90.966  | 0.068                 | 0.069                |
| 0.465 | 49.213   | 266.368 | 0.677                 | 0.671                |
| 0.509 | 37.999   | 82.029  | 0.065                 | 0.056                |
| 0.538 | 93.104   | 246.127 | 0.078                 | 0.083                |
| 0.655 | 48.719   | 198.252 | 0.079                 | 0.082                |
| 0.454 | 26.633   | 283.716 | 0.727                 | 0.731                |
| 0.461 | 91.439   | 264.511 | 0.180                 | 0.190                |
| 0.492 | 98.177   | 321.116 | 0.172                 | 0.178                |
| 0.612 | 49.498   | 317.277 | 0.215                 | 0.212                |
| 0.633 | 20.001   | 150.249 | 0.237                 | 0.236                |
| 0.612 | 33.226   | 259.624 | 0.298                 | 0.300                |
| 0.563 | 46.785   | 109.343 | 0.054                 | 0.053                |
| 0.587 | 63.541   | 59.162  | 0.010                 | 0.020                |
| 0.524 | 33.599   | 273.222 | 0.749                 | 0.742                |
| 0.636 | 64.256   | 200.007 | 0.058                 | 0.055                |
| 0.497 | 74.009   | 193.977 | 0.105                 | 0.112                |
| 0.622 | 29.957   | 321.417 | 0.459                 | 0.470                |
| 0.496 | 20.568   | 232.960 | 2.104                 | 2.082                |
| 0.542 | 36.701   | 235.300 | 0.394                 | 0.390                |
| 0.606 | 38.690   | 307.833 | 0.321                 | 0.321                |
| 0.645 | 48.175   | 291.647 | 0.155                 | 0.152                |
| 0.470 | 55.707   | 223.016 | 0.330                 | 0.329                |

|       |        |         |       |       |
|-------|--------|---------|-------|-------|
| 0.682 | 17.696 | 104.877 | 0.119 | 0.109 |
| 0.644 | 33.623 | 121.980 | 0.071 | 0.075 |
| 0.572 | 82.091 | 315.954 | 0.122 | 0.125 |
| 0.559 | 12.630 | 58.602  | 0.188 | 0.184 |
| 0.562 | 93.597 | 196.970 | 0.045 | 0.038 |
| 0.527 | 75.730 | 100.378 | 0.023 | 0.022 |
| 0.577 | 53.975 | 343.604 | 0.282 | 0.282 |
| 0.578 | 62.067 | 263.808 | 0.139 | 0.147 |
| 0.654 | 31.356 | 200.141 | 0.158 | 0.160 |
| 0.649 | 51.296 | 191.327 | 0.072 | 0.073 |

Mean Absolute Error: 0.60%, Root Mean Square Error: 0.81%.

The  $\Phi 15 \times 5$  mm samples were prepared by varying the concentrations of gelatin (7wt%, 8wt%, 9wt%) or methylcellulose (2wt%, 3wt%, 4wt%), respectively, and the compression modulus was measured after crosslinking in 5 wt%  $\text{CaCl}_2$  for 30 min.

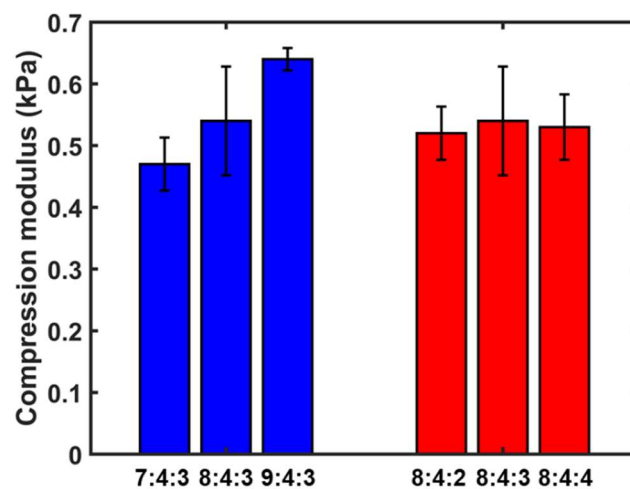

**Fig. S2** Compression modulus of biomaterial inks with different concentrations of gelatin or methylcellulose

Four layers of grid-filled quadrilateral prisms were printed with 8:3:3, 8:4:3, and 8:5:3 biomaterial inks, respectively. Then the widths and shrinkage ratio of 8 filaments before and after crosslinking were measured and calculated.

**Table S5** Widths and shrinkage ratio of 8 filaments before and after crosslinking\*

| Biomaterial inks | Width of filament<br>(Uncrosslinked)<br>(mm) | Width of filament<br>(Crosslinked)<br>(mm) | Shrinkage ratio |
|------------------|----------------------------------------------|--------------------------------------------|-----------------|
| 8:3:3            | $0.29 \pm 0.062$                             | $0.32 \pm 0.027$                           | -8.7%           |
| 8:4:3            | $0.38 \pm 0.045$                             | $0.33 \pm 0.023$                           | 12.3%           |
| 8:5:3            | $0.48 \pm 0.030$                             | $0.44 \pm 0.027$                           | 9.8%            |

\* The values were averaged from 8 filaments taken from each sample.



A solid and a grid-filled quadrilateral prism with dimension of  $10 \times 10 \times 3 \text{ mm}^3$  were printed with 8:4:3 biomaterial ink. The blue circle is the starting points for each layer of printing, and the green dotted line is the outline of the first layer, all of which maintained high fidelity.

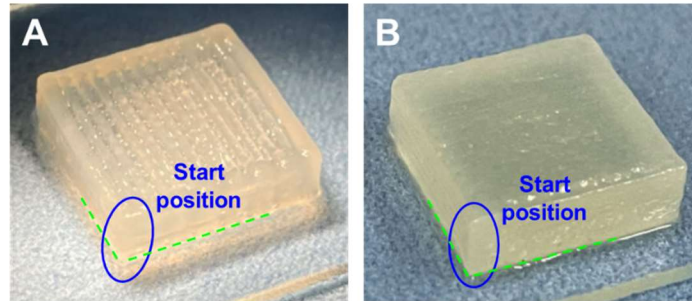

**Fig. S3** Prints with dimension of  $10 \times 10 \times 3 \text{ mm}^3$  after crosslinking. (A) The solid quadrilateral prism after crosslinking. (B) The grid-filled quadrilateral prism after crosslinking.
